# Supplementary material for: Anharmonic phonon frequency and ultralow lattice thermal conductivity in β-Cu2Se liquid-like thermoelectrics
Source: Royal Society of Chemistry journal article supplement (doi:10.1039/d0cp04591h), 2020-01-01
Supplement: d0cp04591h1.pdf [file d0cp04591h1.pdf]

Supplementary Material for

**Anharmonic Phonon Frequency and Ultralow Lattice Thermal  
Conductivity in  $\beta$ -Cu<sub>2</sub>Se Liquid-like Thermoelectrics**

Wenjie Zhang<sup>1,2</sup>, Chong Zheng<sup>3</sup>, Yanbing Dong<sup>3</sup>, Jia-Yue Yang<sup>1,2\*</sup> and Linhua Liu<sup>1,2\*</sup>

*<sup>1</sup>School of Energy and Power Engineering, Shandong University, Jinan, Shandong 250061, China*

*<sup>2</sup>Optics & Thermal Radiation Research Center, Shandong University, Qingdao, Shandong 266237, China*

*<sup>3</sup>Science and Technology on Optical Radiation Laboratory, Beijing 100854, China*

---

\* Authors to whom correspondence should be addressed. E-Mail: [jy\\_yang@sdu.edu.cn](mailto:jy_yang@sdu.edu.cn) (J.Y.) or [liulinhua@sdu.edu.cn](mailto:liulinhua@sdu.edu.cn) (L. L.)

## S1. Quartic Anharmonic Term

To apply the self-consistent phonon theory (SCPH), the anharmonicity up to the fourth order, i.e.,  $H = H_0 + U_3 + U_4$ , where  $H_0$  is the ground-state Hamiltonian,  $U_3$  is the cubic term and  $U_4$  is the quartic term, is considered.  $U_n$  is the  $n$ th-order contribution to the potential energy surface as a function of atomic displacement, defined as<sup>1</sup>

$$U_n = \frac{1}{n!} \left( \frac{\hbar}{2} \right)^{\frac{n}{2}} \sum_{\{q\}} \Delta(q_1 + \dots + q_n) \frac{\Phi(q_1; \dots; q_n)}{\sqrt{\omega_{q_1} \dots \omega_{q_n}}} \times A_{q_1} \dots A_{q_n}, \quad \text{MERGEFORMAT}$$

(S1)

Where  $A$  is the displacement vector, and the function  $\Delta$  becomes 1 if  $q$  is an integral multiple of the reciprocal vector  $\mathbf{G}$  and is 0 otherwise. The reciprocal representation of the  $n$ th-order interatomic force constants (IFCs)  $\Phi$  is defined by<sup>1</sup>

$$\Phi(q_1; \dots; q_n) = N^{1-\frac{n}{2}} \sum_{\{\kappa, \mu\}} (M_{\kappa_1} \dots M_{\kappa_n})^{\frac{-1}{2}} e_{\mu_1}(\kappa_1; q_1) \dots e_{\mu_n}(\kappa_n; q_n) \times \sum_{l_2, \dots, l_n} \Phi_{\mu_1 \dots \mu_n}(0\kappa_1; \dots; l_n \kappa_n) e^{i(q_2 r(l_2) + \dots + q_n r(l_n))}.$$

MERGEFORMAT (S2)

where  $M$  is the mass of the atom,  $\Phi_{\mu_1 \dots \mu_n}$  is the real-space IFCs for the atom  $\kappa$  in the  $l$ th cell along the  $\mu$  direction. With the high-order anharmonic IFCs, the corresponding phonon self-energy and anharmonic phonon frequency can be renormalized.

## S2. Phonon Disperse Relation

Due to the existence of liquid-like behaviors, the commonly adopted harmonic approximation will fail, resulting in the large imaginary phonon modes. In Fig. S1, the harmonic phonon dispersion

relation of  $\beta$ -Cu<sub>2</sub>Se is presented. a large number of imaginary phonon modes in the first Brillouin zone is observed, indicating the existence of strong anharmonicity. We also apply the TDEP method to calculate the anharmonic phonon frequencies at finite temperatures and compare them with the harmonic phonon dispersion, as shown in Fig. S2. Though extracting the phonon frequencies from the molecular dynamics, imaginary phonon frequencies still exist.

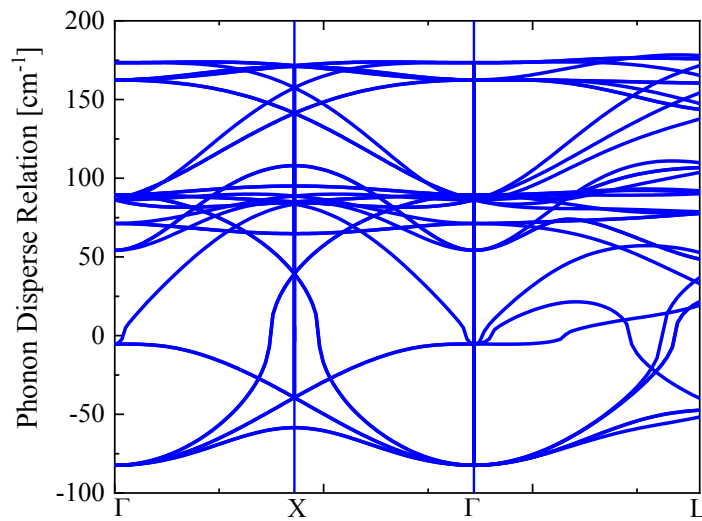

Fig. S1. The harmonic phonon dispersion of  $\beta$ -Cu<sub>2</sub>Se at 0 K.

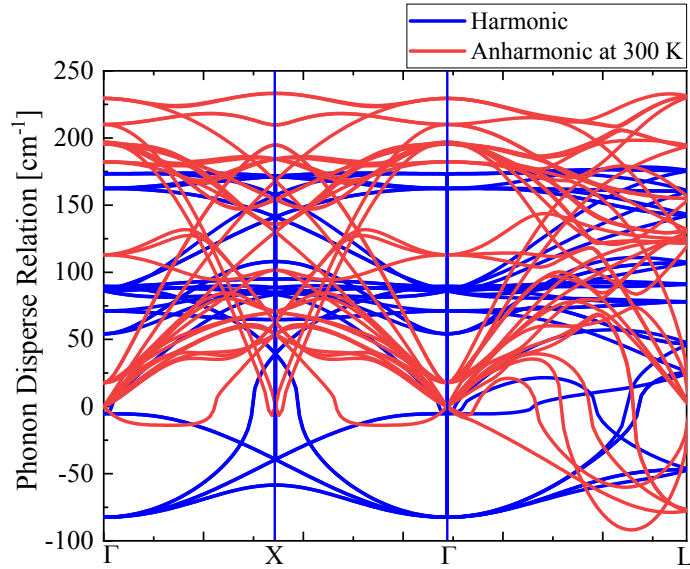

Fig. S2. The harmonic and anharmonic (TDEP, at 300 K) phonon dispersions of  $\beta$ -Cu<sub>2</sub>Se.

The Grüneisen parameter is the physical quantity which suggests the anharmonicity in the solids.<sup>2</sup> In Fig. S3, the mode-dependent Grüneisen parameter of  $\beta$ -Cu<sub>2</sub>Se is calculated using the SCPH method and it shows that strong anharmonicity exists along the L- $\Gamma$  high-symmetry line.

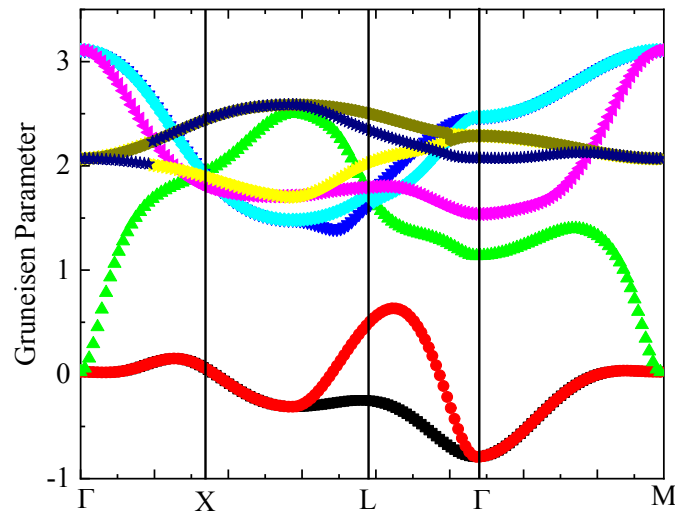

Fig. S3. The mode-dependent Grüneisen parameter of  $\beta$ -Cu<sub>2</sub>Se calculated using SCPH method.

## S2. Anharmonic Phonon Scattering

In Fig. S4, the cumulative lattice thermal conductivity as a function of phonon frequency is presented. It shows that low-lying phonon frequencies below  $32 \text{ cm}^{-1}$  contribute little to the total thermal transport. To get more details about the anharmonic scattering, the scattering phase space of  $\beta\text{-Cu}_2\text{Se}$  within the three-phonon scattering scheme is calculated. Fig. S5 shows that the absorption process where two phonons with lower energy collide into a high-energy phonon dominates the anharmonic scattering for heat-carrying phonons.

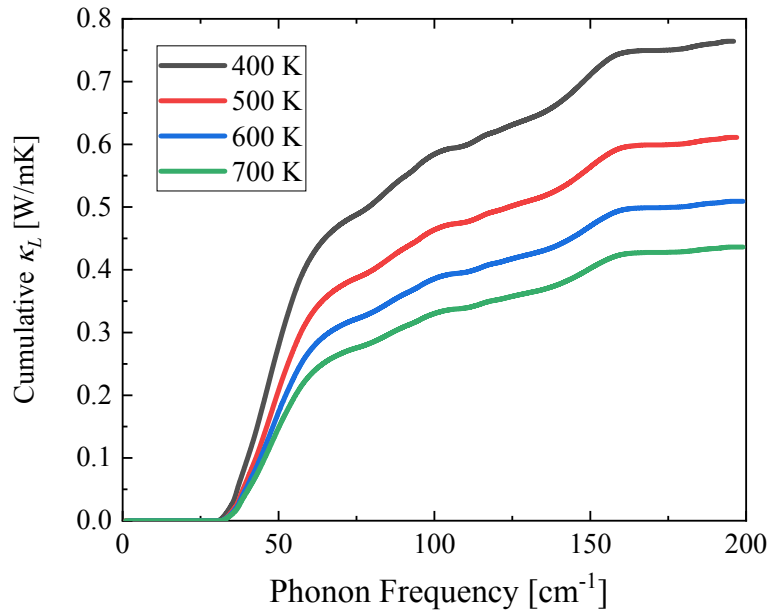

Fig. S4. The cumulative lattice thermal conductivity as a function of phonon frequency.

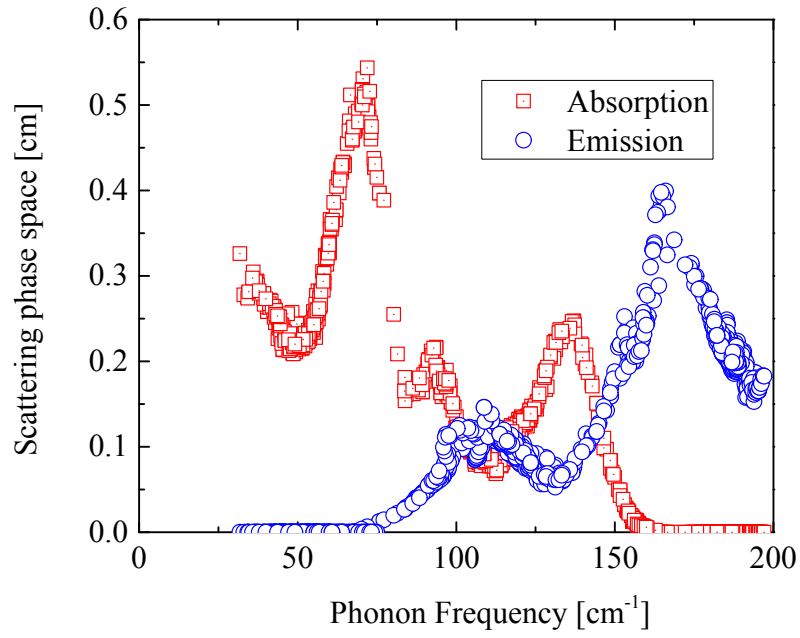

Fig. S5. The scattering phase space of  $\beta$ -Cu<sub>2</sub>Se at 400 K.

### S3. Convergence Test

We also perform the convergence test on the anharmonic phonon dispersion and lattice thermal conductivity as a function of  $q$ -mesh, as shown in Figs. S6 and S7.

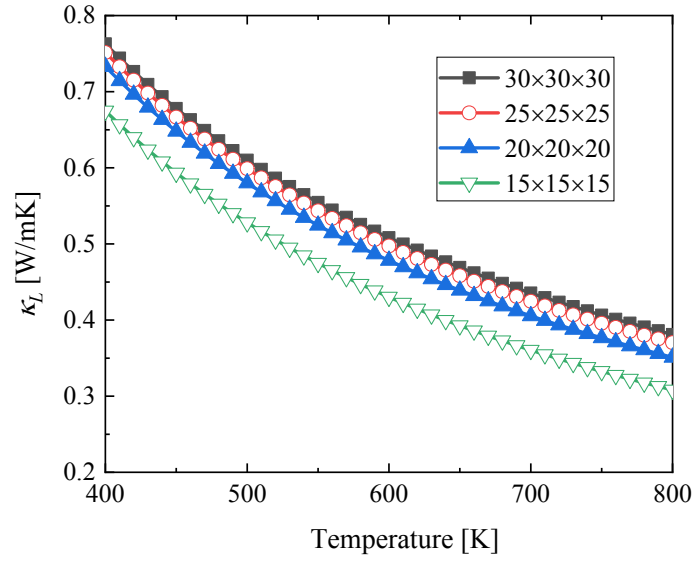

Fig. S6. The convergence test of lattice thermal conductivity as a function of  $q$ -mesh.

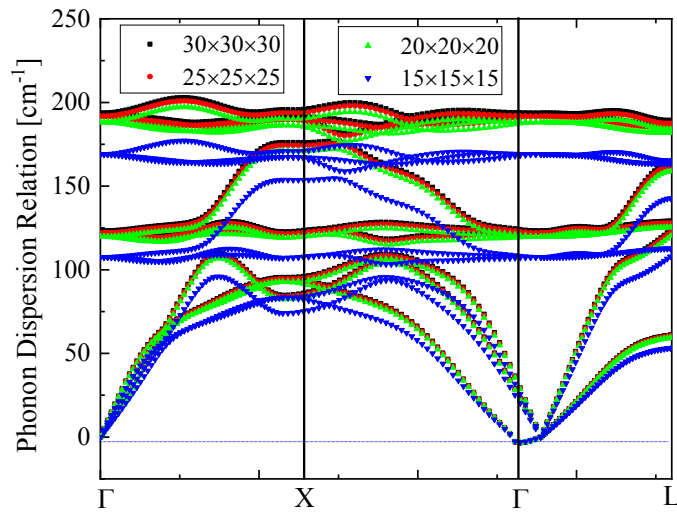

Fig. S7. The convergence test of anharmonic phonon frequency at 400 K as a function of  $q$ -mesh.

## References

1. T. Tadano and S. Tsuneyuki, *Phy. Rev. B* **92** (5), 054301 (2015).
2. J. M. Ziman, *Principles of the Theory of Solids*. (Cambridge University Press, 1972).
